# Supplementary material for: Arbuscular mycorrhizal fungi and belowground herbivore interact to determine plant productivity and subsequent conspecifics performance by changing plant metabolites
Source: Research Square preprint supplement (doi:10.21203/rs.3.rs-2557932/v1), 2023-02-09
Supplement: Supplementary file 1 [file f36d7e9dd452e94a39025e1b.docx]

**Supporting Information**

**Figure S1**

**
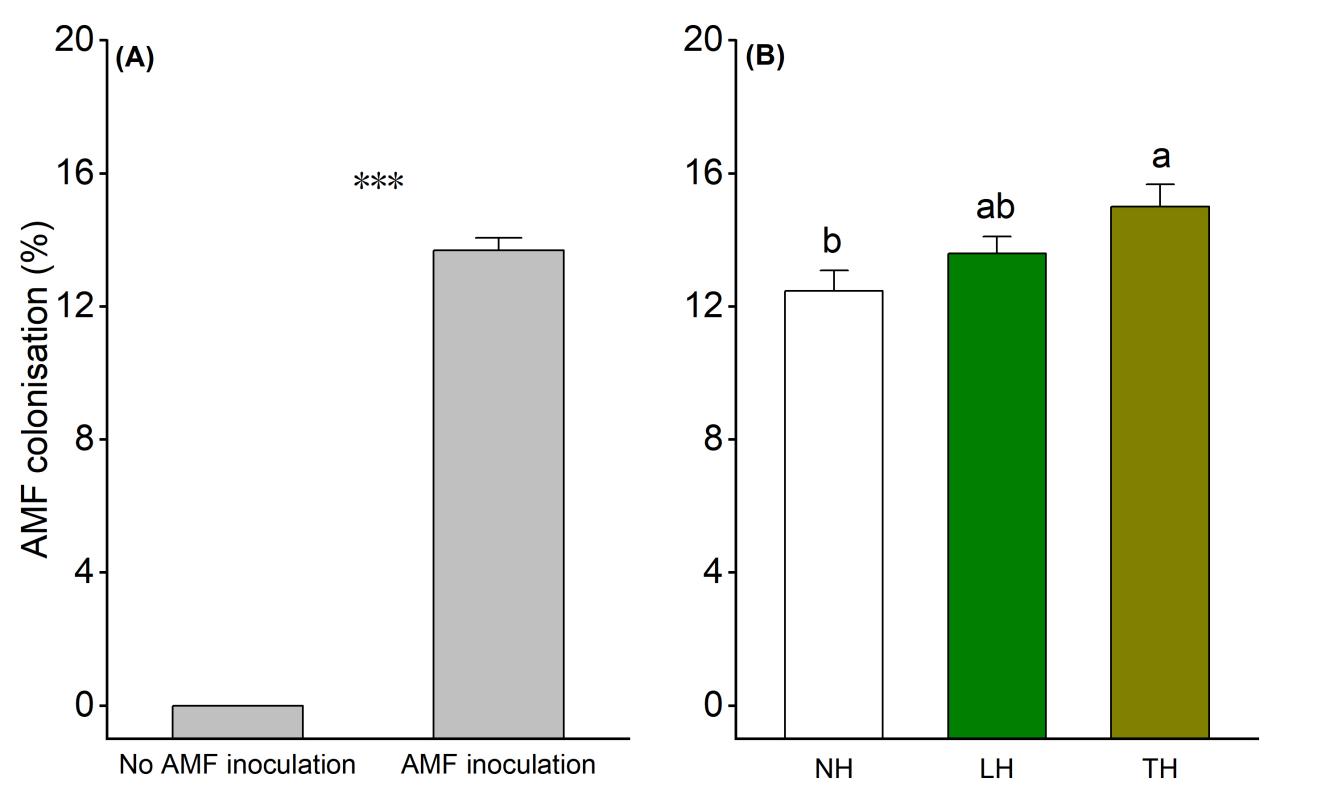
**

**Fig. S1.** (A)AMF colonisation rate of plants with/without AMF inoculation. Differences between treatments were determined by *t test* ( *** *P*<0.001). (B) Effects of *Phthorimaea operculella* herbivory(no herbivory(NH), leaf herbivory(LH) and tuber herbivory(TH)) on AMF colonisation. Different letters show significant differences. Data are means±SE.

**Table S1**. Results of two-way ANOVAs analyses on the effects of AMF (No AMF inoculation and AMF inoculation) and herbivory by *Phthorimaea operculella* (no herbivory, leaf herbivory and tuber herbivory) on plant productivity and subsequent insect performance.

| Variable | AMF (A) | | | |  | Herbivory (H) | | |  | A×H | | |
| --- | --- | --- | --- | --- | --- | --- | --- | --- | --- | --- | --- | --- |
| *d.f* | | *F* | *P* |  | *d.f* | *F* | *P* |  | *d.f* | *F* | *P* |
| *Plant productivity* |  | |  |  |  |  |  |  |  |  |  |  |
| Shoot biomass | | 1 | 118.8512 | **<0.001** |  | 2 | 6.889 | **0.002** |  | 2 | 1.688 | 0.191 |
| Root biomass | | 1 | 80.241 | **<0.001** |  | 2 | 3.349 | **0.040** |  | 2 | 1.143 | 0.324 |
| Tuber biomass | | 1 | 93.884 | **<0.001** |  | 2 | 28.917 | **<0.001** |  | 2 | 0.443 | 0.644 |
| Total biomass | | 1 | 146.754 | **<0.001** |  | 2 | 20.181 | **<0.001** |  | 2 | 1.110 | 0.334 |
| *Insect performance* |  | |  |  |  |  |  |  |  |  |  |  |
| Weight gain (leaf) | | 1 | 0.298 | 0.586 |  | 2 | 30.426 | **<0.001** |  | 2 | 1.906 | 0.152 |
| Weight gain (tuber) | | 1 | 44.203 | **<0.001** |  | 2 | 2.227 | 0.111 |  | 2 | 9.217 | **<0.001** |

Note：Significant results are in bold (*P*<0.05).

**Table S2**. Results of orthogonal contrasts on the effects of AMF (No AMF inoculation, AMF inoculation) and herbivory by *Phthorimaea operculella* (No herbivory (NH), Leaf herbivory (LH), Tuber herbivory (TH)) on plant productivity and subsequent insect performance.

| Variable | LH vs NH | | |  | TH vs NH | | |  | AMF×(LH vs NH) | | |  | AMF×(TH vs NH) | | |
| --- | --- | --- | --- | --- | --- | --- | --- | --- | --- | --- | --- | --- | --- | --- | --- |
| *d.f.* | *F* | *P* |  | *d.f.* | *F* | *P* |  | *d.f.* | *F* | *P* |  | *d.f.* | *F* | *P* |
| *Plant productivity* |  |  |  |  |  |  |  |  |  |  |  |  |  |  |  |
| Shoot biomass | 1 | 14.749 | **<0.001** |  | 1 | 2.826 | 0.098 |  | 1 | 2.552 | 0.116 |  | 1 | 2.401 | 0.127 |
| Root biomass | 1 | 5.737 | **0.020** |  | 1 | 4.729 | **0.034** |  | 1 | 0.233 | 0.631 |  | 1 | 2.097 | 0.153 |
| Tuber biomass | 1 | 2.723 | 0.105 |  | 1 | 34.997 | **<0.001** |  | 1 | 0.508 | 0.479 |  | 1 | 0.885 | 0.351 |
| Total biomass | 1 | 8.494 | **0.005** |  | 1 | 12.872 | **0.001** |  | 1 | 1.459 | 0.232 |  | 1 | 1.981 | 0.165 |
| *Insect performance* |  |  |  |  |  |  |  |  |  |  |  |  |  |  |  |
| Weight gain (leaf) | 1 | 0.944 | 0.338 |  | 1 | 51.732 | **<0.001** |  | 1 | 0.317 | 0.577 |  | 1 | 3.39 | 0.074 |
| Weight gain (tuber) | 1 | 0.877 | 0.355 |  | 1 | 0.643 | 0.428 |  | 1 | 1.858 | 0.181 |  | 1 | 4.313 | **0.045** |

Note：Significant results are in bold (*P*<0.05).

**Table S3**. Results of two-way ANOVAs analyses on the effects of AMF (No AMF inoculation and AMF inoculation) and herbivory by *Phthorimaea operculella* (no herbivory, leaf herbivory and tuber herbivory) on plant primary metabolites in leaves, roots and tubers, and on the tuber allocation ratio for protein, sugar and starch.

| Variable | AMF (A) | | |  | Herbivory (H) | | |  | A×H | | |
| --- | --- | --- | --- | --- | --- | --- | --- | --- | --- | --- | --- |
| *d.f* | *F* | *P* |  | *d.f* | *F* | *P* |  | *d.f* | *F* | *P* |
| *Leaf metabolites* |  |  |  |  |  |  |  |  |  |  |  |
| Leaf carbon (C) | 1 | 2.444 | 0.122 |  | 2 | 0.205 | 0.815 |  | 2 | 0.273 | 0.762 |
| Leaf nitrogen (N) | 1 | 0.898 | 0.346 |  | 2 | 3.707 | **0.029** |  | 2 | 2.344 | 0.102 |
| Leaf C: N | 1 | 0.054 | 0.817 |  | 2 | 1.630 | 0.202 |  | 2 | 1.818 | 0.169 |
| Leaf protein | 1 | 4.045 | **0.048** |  | 2 | 3.295 | **0.042** |  | 2 | 0.752 | 0.474 |
| Leaf sugar | 1 | 94.925 | **<0.001** |  | 2 | 9.011 | **<0.001** |  | 2 | 3.195 | **0.046** |
| Leaf starch | 1 | 6.009 | **0.016** |  | 2 | 13.604 | **<0.001** |  | 2 | 1.932 | 0.151 |
| *Root metabolites* |  |  |  |  |  |  |  |  |  |  |  |
| Root carbon (C) | 1 | 12.381 | **0.001** |  | 2 | 0.317 | 0.729 |  | 2 | 0.097 | 0.908 |
| Root nitrogen (N) | 1 | 0.430 | 0.514 |  | 2 | 0.928 | 0.400 |  | 2 | 0.193 | 0.825 |
| Root C: N | 1 | 0.294 | 0.589 |  | 2 | 0.847 | 0.432 |  | 2 | 0.213 | 0.808 |
| Root protein | 1 | 19.737 | **<0.001** |  | 2 | 0.431 | 0.651 |  | 2 | 0.781 | 0.461 |
| Root sugar | 1 | 2.213 | 0.141 |  | 2 | 0.845 | 0.433 |  | 2 | 0.256 | 0.775 |
| Root starch | 1 | 21.060 | **<0.001** |  | 2 | 1.687 | 0.191 |  | 2 | 1.386 | 0.256 |
| *Tuber metabolites metabolitessients* |  |  |  |  |  |  |  |  |  |  |  |
| Tuber carbon (C) | 1 | 5.466 | **0.022** |  | 2 | 13.058 | **<0.001** |  | 2 | 0.234 | 0.792 |
| Tuber nitrogen (N) | 1 | 2.866 | 0.094 |  | 2 | 1.762 | 0.178 |  | 2 | 1.613 | 0.205 |
| Tuber C: N | 1 | 1.497 | 0.224 |  | 2 | 1.581 | 0.212 |  | 2 | 1.740 | 0.182 |
| Tuber protein | 1 | 171.813 | **<0.001** |  | 2 | 108.514 | **<0.001** |  | 2 | 0.930 | 0.399 |
| Tuber sugar | 1 | 19.269 | **<0.001** |  | 2 | 29.203 | **<0.001** |  | 2 | 0.095 | 0.909 |
| Tuber starch | 1 | 22.684 | **<0.001** |  | 2 | 83.461 | **<0.001** |  | 2 | 6.637 | **0.002** |
| *Tuber allocation ratio* |  |  |  |  |  |  |  |  |  |  |  |
| Protein | 1 | 17.282 | **<0.001** |  | 2 | 46.006 | **<0.001** |  | 2 | 1.96 | 0.147 |
| Sugar | 1 | 68 | **<0.001** |  | 2 | 0.765 | 0.469 |  | 2 | 5.815 | **0.004** |
| Starch | 1 | 7.597 | **0.007** |  | 2 | 61.06 | **<0.001** |  | 2 | 6.261 | **0.003** |

Note：Significant results are in bold (*P*<0.05).

**Table S4**. Results of orthogonal contrasts on the effects of AMF (No AMF inoculation, AMF inoculation) and herbivory by *Phthorimaea operculella* (No herbivory (NH), Leaf herbivory (LH), Tuber herbivory (TH)) on plant primary metabolites in leaves, roots and tubers, and on the tuber allocation ratio for protein, sugar and starch.

| Variable | LH vs NH | | |  | TH vs NH | | |  | AMF×(LH vs NH) | | |  | AMF×(TH vs NH) | | |
| --- | --- | --- | --- | --- | --- | --- | --- | --- | --- | --- | --- | --- | --- | --- | --- |
| *d.f* | *F* | *P* |  | *d.f* | *F* | *P* |  | *d.f* | *F* | *P* |  | *d.f* | *F* | *P* |
| *Leaf metabolites* |  |  |  |  |  |  |  |  |  |  |  |  |  |  |  |
| Leaf carbon (C) | 1 | 0.432 | 0.514 |  | 1 | 0.124 | 0.726 |  | 1 | 0.576 | 0.451 |  | 1 | 0.111 | 0.741 |
| Leaf nitrogen (N) | 1 | 4.560 | **0.037** |  | 1 | 7.318 | **0.009** |  | 1 | 0.720 | 0.400 |  | 1 | 5.977 | **0.018** |
| Leaf C: N | 1 | 1.915 | 0.172 |  | 1 | 3.315 | 0.074 |  | 1 | 1.343 | 0.251 |  | 1 | 4.281 | **0.043** |
| Leaf protein | 1 | 6.822 | **0.012** |  | 1 | 0.768 | 0.384 |  | 1 | 0.716 | 0.401 |  | 1 | 0.152 | 0.698 |
| Leaf sugar | 1 | 2.689 | 0.107 |  | 1 | 6.409 | **0.014** |  | 1 | 8.884 | **0.004** |  | 1 | 0.616 | 0.436 |
| Leaf starch | 1 | 5.496 | **0.023** |  | 1 | 26.633 | **<0.001** |  | 1 | 2.483 | 0.121 |  | 1 | 0.013 | 0.910 |
| *Root metabolites* |  |  |  |  |  |  |  |  |  |  |  |  |  |  |  |
| Root carbon (C) | 1 | 0.117 | 0.734 |  | 1 | 0.699 | 0.407 |  | 1 | 0.149 | 0.701 |  | 1 | 0.007 | 0.935 |
| Root nitrogen (N) | 1 | 2.146 | 0.149 |  | 1 | 0.285 | 0.595 |  | 1 | 0.214 | 0.645 |  | 1 | 0.350 | 0.556 |
| Root C: N | 1 | 1.645 | 0.205 |  | 1 | 0.022 | 0.883 |  | 1 | 0.129 | 0.720 |  | 1 | 0.414 | 0.523 |
| Root protein | 1 | 0.069 | 0.794 |  | 1 | 0.809 | 0.372 |  | 1 | 0.816 | 0.370 |  | 1 | 0.094 | 0.760 |
| Root sugar | 1 | 1.077 | 0.304 |  | 1 | 0.012 | 0.915 |  | 1 | 0.251 | 0.618 |  | 1 | 0.031 | 0.861 |
| Root starch | 1 | 3.235 | 0.077 |  | 1 | 0.172 | 0.680 |  | 1 | 2.852 | 0.097 |  | 1 | 0.471 | 0.496 |
| *Tuber metabolites* |  |  |  |  |  |  |  |  |  |  |  |  |  |  |  |
| Tuber carbon | 1 | 0.049 | 0.826 |  | 1 | 19.94 | **<0.001** |  | 1 | 0.379 | 0.541 |  | 1 | 0.335 | 0.565 |
| Tuber nitrogen | 1 | 3.208 | 0.079 |  | 1 | 0.252 | 0.618 |  | 1 | 1.106 | 0.297 |  | 1 | 0.490 | 0.487 |
| Tuber C:N | 1 | 2.862 | 0.096 |  | 1 | 0.546 | 0.463 |  | 1 | 1.041 | 0.312 |  | 1 | 0.720 | 0.400 |
| Tuber protein | 1 | 45.244 | **<0.001** |  | 1 | 77.357 | **<0.001** |  | 1 | 0.753 | 0.389 |  | 1 | 0.255 | 0.616 |
| Tuber sugar | 1 | 0.370 | 0.545 |  | 1 | 52.673 | **<0.001** |  | 1 | 0.144 | 0.706 |  | 1 | 0.010 | 0.919 |
| Tuber starch | 1 | 13.982 | **<0.001** |  | 1 | 69.742 | **<0.001** |  | 1 | 3.797 | 0.056 |  | 1 | 2.839 | 0.098 |
| *Tuber allocation ratio* |  |  |  |  |  |  |  |  |  |  |  |  |  |  |  |
| Protein | 1 | 1.368 | 0.247 |  | 1 | 40.353 | **<0.001** |  | 1 | 4.563 | **0.037** |  | 1 | 0.001 | 0.990 |
| Sugar | 1 | 0.008 | 0.929 |  | 1 | 0.523 | 0.473 |  | 1 | 11.901 | **0.001** |  | 1 | 1.682 | 0.200 |
| Starch | 1 | 0.336 | 0.564 |  | 1 | 66.944 | **<0.001** |  | 1 | 13.470 | **0.001** |  | 1 | 0.023 | 0.879 |

Note：Significant results are in bold (*P*<0.05).

**Table S5**. Results of two-way ANOVAs analyses on the effects of AMF (No AMF inoculation and AMF inoculation) and herbivory by *Phthorimaea operculella* (no herbivory, leaf herbivory and tuber herbivory) on plant defensive metabolites.

| Variable | AMF (A) | | | |  | Herbivory (H) | | |  | A×H | | |
| --- | --- | --- | --- | --- | --- | --- | --- | --- | --- | --- | --- | --- |
| *d.f* | | *F* | *P* |  | *d.f* | *F* | *P* |  | *d.f* | *F* | *P* |
| *Leaf defence* |  | |  |  |  |  |  |  |  |  |  |  |
| Leaf phenolics | | 1 | 162.605 | **<0.001** |  | 2 | 19.560 | **<0.001** |  | 2 | 4.797 | **0.011** |
| Leaf α-solanine | | 1 | 1.297 | 0.258 |  | 2 | 11.748 | **<0.001** |  | 2 | 1.862 | 0.162 |
| Leaf α-chaconine | | 1 | 1.212 | 0.274 |  | 2 | 46.815 | **<0.001** |  | 2 | 0.032 | 0.969 |
| *Root defence* |  | |  |  |  |  |  |  |  |  |  |  |
| Root phenolics | | 1 | 3.786 | 0.055 |  | 2 | 1.496 | 0.230 |  | 2 | 6.987 | **0.002** |
| Root α-solanine | | 1 | 0.787 | 0.377 |  | 2 | 0.264 | 0.768 |  | 2 | 0.964 | 0.386 |
| Root α-chaconine | | 1 | 0.716 | 0.400 |  | 2 | 3.669 | **0.030** |  | 2 | 0.852 | 0.430 |
| *Tuber defence* |  | |  |  |  |  |  |  |  |  |  |  |
| Tuber phenolics | | 1 | 5.737 | **0.019** |  | 2 | 3.316 | **0.041** |  | 2 | 0.617 | 0.542 |
| Tuber α-solanine | | 1 | 0.207 | 0.650 |  | 2 | 0.787 | 0.458 |  | 2 | 0.108 | 0.898 |
| Tuber α-chaconine | | 1 | 0.111 | 0.740 |  | 2 | 10.355 | **<0.001** |  | 2 | 4.283 | **0.017** |

Note：Significant results are in bold (*P*<0.05).

**Table S6**. Results of orthogonal contrasts on the effects of AMF (No AMF inoculation, AMF inoculation) and herbivory by *Phthorimaea operculella* (No herbivory (NH), Leaf herbivory (LH), Tuber herbivory (TH)) on plant defensive metabolites.

| Variable | LH vs NH | | | |  | TH vs NH | | |  | AMF×(LH vs NH) | | |  | AMF×(TH vs NH) | | |
| --- | --- | --- | --- | --- | --- | --- | --- | --- | --- | --- | --- | --- | --- | --- | --- | --- |
| *d.f* | | *F* | *P* |  | *d.f* | *F* | *P* |  | *d.f* | *F* | *P* |  | *d.f* | *F* | *P* |
| *Leaf defence* |  | |  |  |  |  |  |  |  |  |  |  |  |  |  |  |
| Leaf phenolics | | 1 | 9.988 | **0.003** |  | 1 | 36.748 | **<0.001** |  | 1 | 0.103 | 0.749 |  | 1 | 7.482 | **0.008** |
| Leaf α-solanine | | 1 | 1.531 | 0.221 |  | 1 | 17.914 | **<0.001** |  | 1 | 2.509 | 0.119 |  | 1 | 3.006 | 0.088 |
| Leaf α-chaconine | | 1 | 4.668 | **0.035** |  | 1 | 52.763 | **<0.001** |  | 1 | 0.034 | 0.854 |  | 1 | 0.061 | 0.806 |
| *Root defence* |  | |  |  |  |  |  |  |  |  |  |  |  |  |  |  |
| Root phenolics | | 1 | 0.910 | 0.344 |  | 1 | 2.575 | 0.114 |  | 1 | 7.836 | **0.007** |  | 1 | 11.87 | **0.001** |
| Root α-solanine | | 1 | 0.193 | 0.662 |  | 1 | 0.455 | 0.503 |  | 1 | 2.054 | 0.157 |  | 1 | 0.002 | 0.966 |
| Root α-chaconine | | 1 | 4.934 | **0.030** |  | 1 | 0.282 | 0.598 |  | 1 | 1.426 | 0.237 |  | 1 | 0.008 | 0.928 |
| *Tuber defence* |  | |  |  |  |  |  |  |  |  |  |  |  |  |  |  |
| Tuber phenolics | | 1 | 2.127 | 0.150 |  | 1 | 1.137 | 0.291 |  | 1 | 0.503 | 0.481 |  | 1 | 1.027 | 0.315 |
| Tuber α-solanine | | 1 | 1.391 | 0.243 |  | 1 | 0.700 | 0.406 |  | 1 | 0.075 | 0.785 |  | 1 | 0.184 | 0.669 |
| Tuber α-chaconine | | 1 | 20.067 | **<0.001** |  | 1 | 1.179 | 0.282 |  | 1 | 7.621 | **0.008** |  | 1 | 0.126 | 0.724 |

Note：Significant results are in bold (*P*<0.05).
